# Supplementary material for: Significance of PI3K/AKT signaling pathway in metastasis of esophageal squamous cell carcinoma and its potential as a target for anti-metastasis therapy
Source: PubMed Central journal article supplement (PMC5503569; doi:10.18632/oncotarget.16333), 2017-03-17
Supplement: oncotarget-08-38755-s001.pdf [file oncotarget-08-38755-s001.pdf]

## **Significance of PI3K/AKT signaling pathway in metastasis of esophageal squamous cell carcinoma and its potential as a target for anti-metastasis therapy**

### **SUPPLEMENTARY MATERIALS**

**Supplementary Table 1: Differentially expressed genes (fold change < 2.0) between KYSE410-I3 and KYSE410 cells**

See Supplementary File: 1

Supplementary Table 2: Correlation between p-AKT expression and clinicopathological variables in 82 cases of ESCC

| Parameters             | p-AKT |      | Total | P value |
|------------------------|-------|------|-------|---------|
|                        | Low   | High |       |         |
| <b>Number</b>          | 47    | 35   | 82    | -       |
| <b>Age (year)</b>      |       |      |       |         |
| < 63                   | 21    | 19   | 40    |         |
| ≥ 63                   | 23    | 19   | 42    | 1.000   |
| <b>Size (cm)</b>       |       |      |       |         |
| < 5.0                  | 20    | 14   | 34    |         |
| ≥ 5.0                  | 24    | 24   | 48    | 0.503   |
| <b>Gender</b>          |       |      |       |         |
| Male                   | 37    | 33   | 70    |         |
| Female                 | 7     | 5    | 12    | 0.765   |
| <b>Differentiation</b> |       |      |       |         |
| Well and moderate      | 37    | 32   | 69    |         |
| Poor                   | 7     | 6    | 13    | 1.0     |
| <b>Location</b>        |       |      |       |         |
| Upper                  | 5     | 1    | 6     |         |
| Middle or lower        | 39    | 37   | 76    | 0.209   |
| <b>T-Stage</b>         |       |      |       |         |
| 1                      | 2     | 0    | 2     |         |
| 2                      | 0     | 2    | 2     |         |
| 3                      | 30    | 28   | 58    |         |
| 4                      | 12    | 8    | 20    | 0.217   |
| <b>N-Stage</b>         |       |      |       |         |
| N0                     | 13    | 10   | 23    |         |
| N1                     | 31    | 28   | 59    | 0.809   |
| <b>M-Stage</b>         |       |      |       |         |
| M0                     | 43    | 37   | 80    |         |
| M1                     | 1     | 1    | 2     | 1.000   |

Abbreviations: T, tumor; N, nodal; M, metastasis.

**Supplementary Table 3: Clinicopathological characteristics and p-AKT staining score of 82 cases of ESCC in TMA**

See Supplementary File: 2
