# Supplementary material for: Significance of PI3K/AKT signaling pathway in metastasis of esophageal squamous cell carcinoma and its potential as a target for anti-metastasis therapy
Source: PubMed Central journal article supplement (PMC5503569; doi:10.18632/oncotarget.16333), 2017-03-17
Supplement: oncotarget-08-38755-s003.pdf [file oncotarget-08-38755-s003.pdf]

**Supplementary Table S3.** Clinicopathological characteristics and p-AKT staining score of 82 cases of ESCC in TMA.

| Case No. | Age | Gender | Location | Size (cm) | Differentiation | T-stage | N-stage | M-stage | Stage | p-AKT score |
|----------|-----|--------|----------|-----------|-----------------|---------|---------|---------|-------|-------------|
| 1        | 68  | M      | M        | 3         | M               | 3       | 1       | 0       | 3     | 3           |
| 2        | 64  | F      | M        | 4         | P               | 3       | 0       | 0       | 2     | 1           |
| 3        | 74  | M      | M        | 3         | M               | 3       | 1       | 0       | 3     | 1           |
| 4        | 59  | M      | M        | 9.5       | W               | 4       | 1       | 0       | 3     | 2           |
| 5        | 61  | M      | M        | 5.5       | W               | 3       | 1       | 0       | 3     | 1           |
| 6        | 69  | M      | M        | 7         | M               | 3       | 1       | 0       | 3     | 3           |
| 7        | 61  | F      | M        | 4         | P               | 3       | 1       | 0       | 3     | 3           |
| 8        | 66  | F      | M        | 7.5       | M               | 3       | 1       | 0       | 3     | 3           |
| 9        | 59  | F      | M        | 11        | M               | 4       | 1       | 0       | 3     | 2           |
| 10       | 61  | F      | U        | 7         | M               | 4       | 1       | 0       | 3     | 1           |
| 11       | 57  | M      | M        | 1         | W               | 3       | 1       | 0       | 3     | 3           |
| 12       | 67  | F      | L        | 3.5       | M               | 3       | 1       | 0       | 3     | 1           |
| 13       | 74  | F      | L        | 4         | W               | 3       | 1       | 0       | 3     | 1           |
| 14       | 57  | M      | M        | 7         | M               | 3       | 1       | 0       | 3     | 1           |
| 15       | 54  | M      | L        | 6         | M               | 3       | 1       | 0       | 3     | 1           |
| 16       | 58  | M      | L        | 5         | M               | 3       | 1       | 0       | 3     | 3           |
| 17       | 57  | M      | M        | 5         | M               | 3       | 1       | 0       | 3     | 3           |
| 18       | 54  | M      | U        | 4         | M               | 4       | 1       | 0       | 3     | 1           |
| 19       | 69  | M      | L        | 7.5       | W               | 4       | 0       | 0       | 3     | 1           |
| 20       | 65  | M      | L        | 9         | W               | 4       | 0       | 0       | 3     | 1           |
| 21       | 56  | M      | L        | 4         | W               | 3       | 1       | 0       | 3     | 1           |
| 22       | 50  | M      | L        | 5         | W               | 3       | 1       | 0       | 3     | 3           |
| 23       | 54  | M      | M        | 4.5       | P               | 3       | 1       | 0       | 3     | 1           |
| 24       | 61  | M      | L        | 3.2       | M               | 3       | 1       | 0       | 3     | 1           |
| 25       | 54  | M      | M        | 8         | W               | 3       | 0       | 0       | 2     | 1           |
| 26       | 75  | M      | U        | 5         | W               | 3       | 1       | 0       | 3     | 1           |
| 27       | 73  | M      | L        | 5         | M               | 3       | 1       | 0       | 3     | 1           |
| 28       | 63  | M      | M        | 4.5       | W               | 3       | 1       | 0       | 3     | 1           |
| 29       | 51  | M      | M        | 4         | P               | 3       | 1       | 0       | 3     | 1           |
| 30       | 57  | M      | M        | 10.5      | P               | 4       | 1       | 0       | 3     | 2           |
| 31       | 62  | M      | M        | 5.5       | W               | 4       | 1       | 0       | 3     | 1           |
| 32       | 63  | M      | M        | 10        | W               | 4       | 1       | 0       | 3     | 1           |
| 33       | 49  | M      | L        | 2.5       | M               | 3       | 1       | 1       | 4     | 2           |
| 34       | 66  | M      | L        | 6         | W               | 3       | 1       | 0       | 3     | 3           |
| 35       | 48  | M      | L        | 4         | W               | 3       | 0       | 0       | 1     | 3           |
| 36       | 66  | M      | L        | 5         | M               | 4       | 1       | 0       | 3     | 3           |
| 37       | 65  | M      | L        | 7         | P               | 3       | 1       | 0       | 3     | 2           |
| 38       | 66  | M      | M        | 6         | W               | 3       | 0       | 0       | 2     | 2           |
| 39       | 60  | F      | M        | 4         | M               | 4       | 1       | 0       | 3     | 1           |
| 40       | 55  | M      | L        | 7         | M               | 3       | 1       | 0       | 3     | 1           |
| 41       | 66  | M      | L        | 3         | P               | 3       | 1       | 0       | 3     | 1           |
| 42       | 58  | M      | M        | 3.5       | W               | 1       | 0       | 0       | 1     | 1           |
| 43       | 41  | M      | L        | 9         | M               | 3       | 1       | 0       | 3     | 1           |
| 44       | 39  | M      | M        | 12        | M               | 4       | 1       | 0       | 3     | 2           |

**Supplementary Table S3.** (continued)

| Case No. | Age | Gender | Location | Size (cm) | Differentiation | T stage | N stage | M stage | Stage | p-AKT staining |
|----------|-----|--------|----------|-----------|-----------------|---------|---------|---------|-------|----------------|
| 45       | 46  | M      | M        | 5         | W               | 3       | 1       | 0       | 3     | 1              |
| 46       | 60  | M      | M        | 4         | M               | 4       | 1       | 0       | 3     | 1              |
| 47       | 59  | F      | M        | 7.5       | M               | 3       | 1       | 0       | 3     | 1              |
| 48       | 55  | M      | L        | 1         | P               | 1       | 0       | 0       | 1     | 1              |
| 49       | 53  | M      | M        | 4.5       | W               | 3       | 0       | 0       | 2     | 2              |
| 50       | 77  | M      | L        | 2.5       | M               | 3       | 1       | 0       | 3     | 1              |
| 51       | 76  | M      | M        | 5         | W               | 4       | 0       | 0       | 3     | 1              |
| 52       | 58  | M      | M        | 3.5       | W               | 3       | 1       | 0       | 3     | 2              |
| 53       | 83  | M      | M        | 4         | M               | 3       | 1       | 0       | 3     | 1              |
| 54       | 74  | M      | M        | 7         | W               | 4       | 0       | 0       | 3     | 1              |
| 55       | 72  | M      | L        | 5         | M               | 3       | 1       | 0       | 3     | 1              |
| 56       | 78  | M      | M        | 6.5       | P               | 4       | 0       | 0       | 3     | 1              |
| 57       | 80  | M      | U        | 3         | M               | 4       | 0       | 0       | 3     | 1              |
| 58       | 43  | M      | L        | 4         | M               | 3       | 1       | 0       | 3     | 1              |
| 59       | 61  | M      | L        | 5         | W               | 3       | 1       | 0       | 3     | 2              |
| 60       | 62  | M      | M        | 5         | M               | 4       | 1       | 0       | 3     | 3              |
| 61       | 70  | F      | M        | 3.5       | M               | 2       | 0       | 0       | 2     | 3              |
| 62       | 65  | M      | M        | 2.5       | M               | 3       | 0       | 0       | 2     | 1              |
| 63       | 75  | F      | M        | 6         | P               | 3       | 0       | 0       | 2     | 1              |
| 64       | 61  | M      | L        | 6.5       | W               | 3       | 1       | 0       | 3     | 1              |
| 65       | 40  | M      | M        | 7.5       | P               | 3       | 1       | 0       | 3     | 2              |
| 66       | 77  | M      | U        | 5         | W               | 3       | 1       | 1       | 4     | 1              |
| 67       | 47  | M      | U        | 4         | M               | 4       | 1       | 0       | 3     | 3              |
| 68       | 64  | M      | M        | 5         | P               | 3       | 0       | 0       | 2     | 3              |
| 69       | 68  | M      | M        | 4.5       | M               | 3       | 1       | 0       | 3     | 3              |
| 70       | 74  | M      | M        | 6.5       | W               | 3       | 1       | 0       | 3     | 2              |
| 71       | 67  | M      | M        | 4.5       | W               | 3       | 0       | 0       | 2     | 2              |
| 72       | 66  | M      | L        | 3.5       | M               | 3       | 1       | 0       | 3     | 3              |
| 73       | 63  | M      | L        | 4         | M               | 3       | 0       | 0       | 2     | 2              |
| 74       | 64  | M      | L        | 6         | M               | 3       | 0       | 0       | 2     | 1              |
| 75       | 72  | M      | M        | 3         | P               | 3       | 1       | 0       | 3     | 2              |
| 76       | 66  | M      | L        | 7         | W               | 3       | 1       | 0       | 3     | 2              |
| 77       | 60  | M      | M        | 6.5       | W               | 4       | 1       | 0       | 3     | 3              |
| 78       | 67  | M      | L        | 5         | W               | 3       | 0       | 0       | 2     | 3              |
| 79       | 73  | M      | M        | 5         | M               | 3       | 1       | 0       | 3     | 1              |
| 80       | 46  | F      | M        | 5.5       | M               | 2       | 0       | 0       | 2     | 3              |
| 81       | 71  | M      | M        | 6.5       | W               | 3       | 0       | 0       | 2     | 2              |
| 82       | 65  | M      | L        | 7         | M               | 3       | 1       | 0       | 3     | 2              |

Gender (M = male; F = female); U = upper oesophagus; M = middle oesophagus; L = lower oesophagus; W = well differentiated; M= moderately differentiated; P = poorly differentiated.
